# Supplementary material for: Sequence Profiling of the Saccharomyces cerevisiae Genome Permits Deconvolution of Unique and Multialigned Reads for Variant Detection
Source: PubMed Central journal article supplement (PMC4059241; doi:10.1534/g3.113.009464), 2014-02-20
Supplement: supp_g3.113.009464_FigureS2.pdf [file supp_g3.113.009464_FigureS2.pdf]

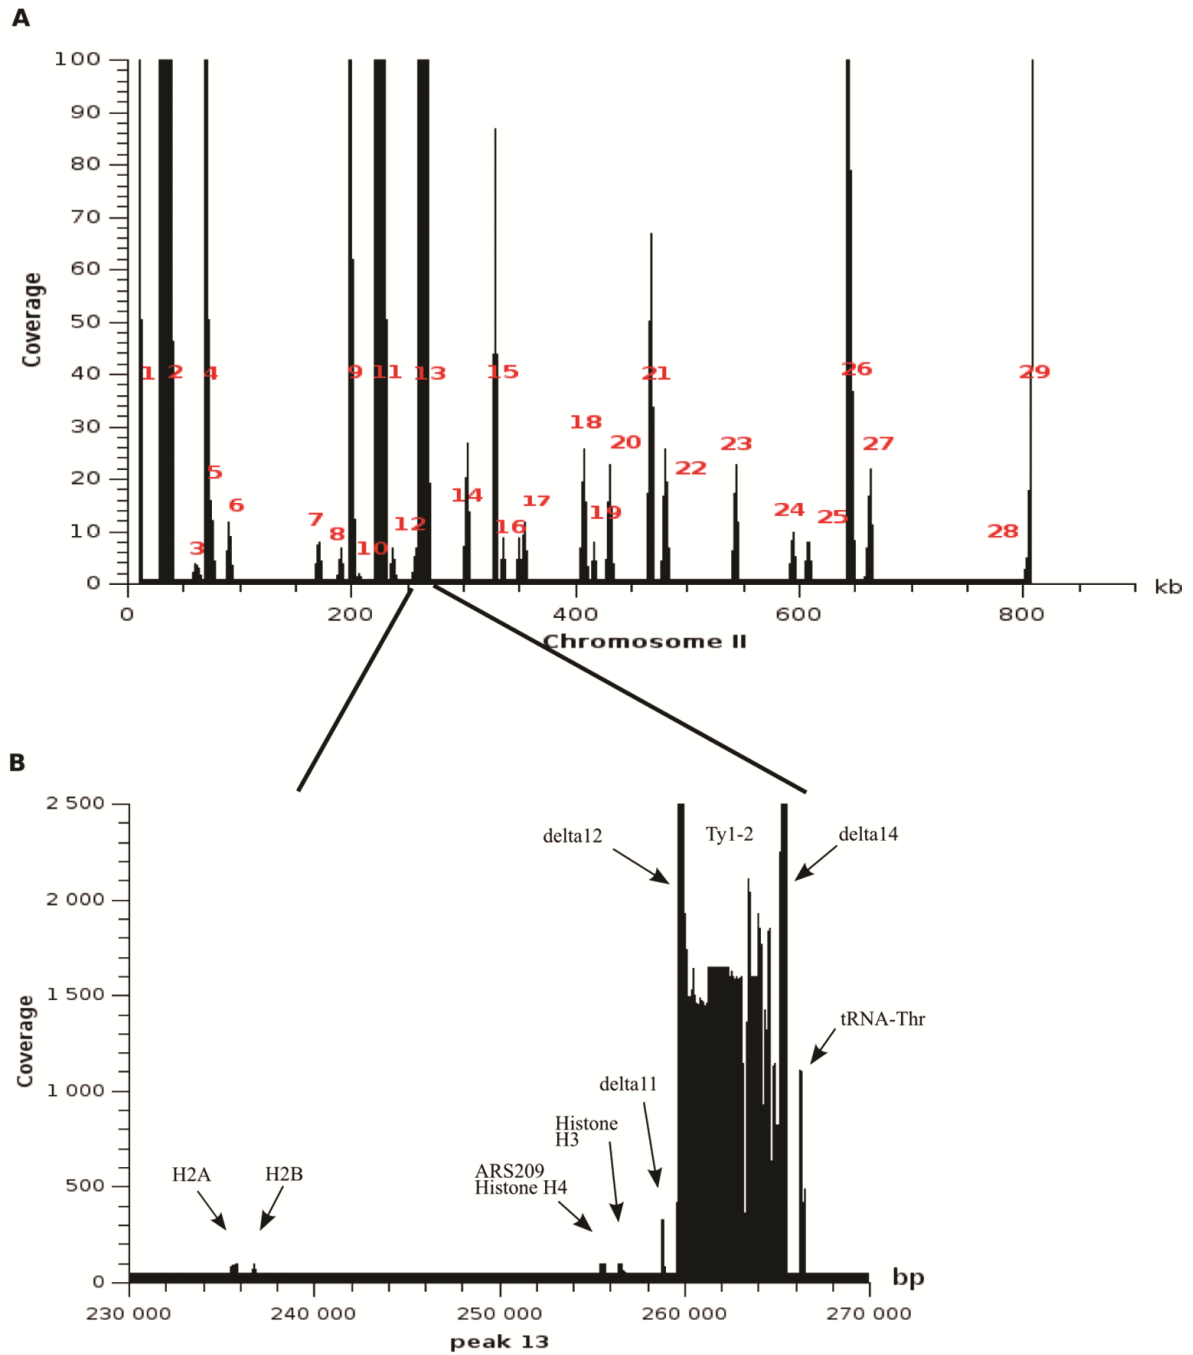

**Figure S2** Virtual HTS profile coverage of chromosome II. (A) 2kb window coverage along the whole chromosome II, computed at the base level. (B) Contribution of functional annotation to multi-aligned regions of the peak 13.
