# Supplementary material for: Sequence Profiling of the Saccharomyces cerevisiae Genome Permits Deconvolution of Unique and Multialigned Reads for Variant Detection
Source: PubMed Central journal article supplement (PMC4059241; doi:10.1534/g3.113.009464), 2014-02-20
Supplement: supp_g3.113.009464_TableS1.pdf [file supp_g3.113.009464_TableS1.pdf]

**Table S1 Functional annotation of M regions along chromosome II**

| #peak | M region start | M region stop | Systematic name         | Standard name |
|-------|----------------|---------------|-------------------------|---------------|
| 1     | 1              | 5856          | TEL02L                  |               |
| 1     |                |               | TEL02L-YP               |               |
| 1     |                |               | YBL113C                 |               |
| 1     |                |               | YBL113W-A               |               |
| 1     |                |               | TEL02L-YP_repeat_region |               |
| 1     |                |               | YBL112C                 |               |
| 1     |                |               | YBL111C                 |               |
| 1     |                |               | YBL109W                 |               |
| 1     |                |               | TEL02L-XR               |               |
| 1     | 5905           | 8310          | YBL109W                 |               |
| 1     |                |               | TEL02L-XR               |               |
| 1     |                |               | TEL02L-XC               |               |
| 1     |                |               | YBL108C-A               | <i>PAU9</i>   |
| 1     |                |               | YBL108W                 |               |
| 1     | 8328           | 8420          | YBL108W                 |               |
| 1     | 8864           | 8915          | YBLWdelta2              |               |
| 1     | 8944           | 9012          | YBLWdelta2              |               |
| 1     | 9080           | 9434          | YBLWdelta3              |               |
| 1     | 9569           | 9684          | tL(UAA)B1               |               |
| 2     | 29623          | 35611         | YBLWdelta4              |               |
| 2     |                |               | YBLWty2-1               |               |
| 2     |                |               | YBLWdelta5              |               |
| 2     |                |               | YBWdelta6               |               |
| 2     | 35838          | 36229         | YBLCtau1                |               |
| 2     | 36385          | 36496         | tF(GAA)B                |               |
| 3     | 59834          | 60099         | YBL087C                 | <i>RPL23A</i> |
| 3     | 60101          | 60192         | YBL087C                 | <i>RPL23A</i> |
| 4     | 68267          | 68356         | YBL084C                 | <i>CDC27</i>  |
| 5     | 72337          | 72410         | YBL081C                 |               |
| 6     | 88512          | 89126         | YBL072C                 | <i>RPS8A</i>  |
| 6     | 92826          | 92875         | YBL068W                 | <i>PRS4</i>   |
| 7     | 166365         | 166436        | YBL029W                 |               |
| 7     | 168808         | 168889        | YBL027W                 | <i>RPL19B</i> |
| 7     | 168927         | 169201        | YBL027W                 | <i>RPL19B</i> |
| 7     | 169209         | 169379        | YBL027W                 | <i>RPL19B</i> |
| 7     | 175875         | 175929        | YBL023C                 | <i>MCM2</i>   |
| 8     | 187312         | 187368        | YBL017C                 | <i>PEP1</i>   |
| 8     | 187673         | 187781        | YBL017C                 | <i>PEP1</i>   |
| 8     | 187991         | 188054        | YBL017C                 | <i>PEP1</i>   |
| 8     | 188351         | 188418        | YBL017C                 | <i>PEP1</i>   |
| 8     | 188477         | 188590        | YBL017C                 | <i>PEP1</i>   |
| 8     | 188592         | 188742        | YBL017C                 | <i>PEP1</i>   |
| 8     | 188877         | 188928        | YBL017C                 | <i>PEP1</i>   |
| 8     | 188930         | 188994        | YBL017C                 | <i>PEP1</i>   |
| 8     | 189002         | 189051        | YBL017C                 | <i>PEP1</i>   |
| 9     | 197488         | 197583        | tI(AAU)B                |               |
| 10    | 197616         | 198069        | tG(GCC)B                |               |
| 10    |                |               | YBLWsigma1              |               |
| 11    | 205746         | 205813        | YBL011W                 | <i>SCT1</i>   |
| 12    | 221028         | 226963        | YBLWdelta8              |               |
| 12    |                |               | YBLWdelta9              |               |
| 12    |                |               | YBLWty1-1               |               |
| 12    |                |               | YBLWdelta10             |               |
| 12    | 227062         | 227177        | tS(AGA)B                |               |

|    |        |        |             |        |
|----|--------|--------|-------------|--------|
| 13 | 235403 | 235810 | YBL003C     | HTA2   |
| 13 | 236618 | 236763 | YBL002W     | HTB2   |
| 13 | 255367 | 255688 | ARS209      | ARS209 |
| 13 |        |        | YBR009C     | HHF1   |
| 13 | 256374 | 256624 | YBR010W     | HHT1   |
| 13 | 256683 | 256737 | YBR010W     | HHT1   |
| 13 | 258689 | 258810 | YBRCdelta11 |        |
| 13 | 258859 | 258926 | YBRCdelta11 |        |
| 13 | 259564 | 263149 | YBR012C     |        |
| 13 |        |        | YBRWdelta12 |        |
| 13 |        |        | YBRWTy1-2   |        |
| 13 | 263164 | 265504 | YBRWTy1-2   |        |
| 13 | 266172 | 266256 | YBRCdelta14 |        |
| 13 | 266367 | 266465 | tT(AGU)B    |        |
| 13 | 270424 | 270488 | YBR016W     |        |
| 14 | 300159 | 301247 | YBR031W     | RPL4A  |
| 15 | 326780 | 326872 | tV(UAC)B    |        |
| 15 | 327163 | 327352 | YBRWdelta15 |        |
| 16 | 332826 | 332880 | YBR048W     | RPS11B |
| 16 | 333383 | 333810 | YBR048W     | RPS11B |
| 16 | 343123 | 343181 | YBR054W     | YRO2   |
| 16 | 343564 | 343616 | YBR054W     | YRO2   |
| 17 | 347591 | 347704 | /           |        |
| 17 | 350815 | 350906 | tQ(UUG)B    |        |
| 17 | 353582 | 353664 | /           |        |
| 17 | 372325 | 372392 | YBR067C     | TIP1   |
| 18 | 405845 | 406059 | tR(UCU)B    |        |
| 18 |        |        | tD(GUC)B    |        |
| 19 | 414180 | 414350 | YBR084C-A   | RPL19A |
| 19 | 414358 | 414632 | YBR084C-A   | RPL19A |
| 19 | 414670 | 414751 | YBR084C-A   | RPL19A |
| 20 | 427755 | 428109 | YBR092C     | PHO3   |
| 20 | 428336 | 428399 | YBR092C     | PHO3   |
| 20 | 428485 | 428576 | YBR092C     | PHO3   |
| 20 | 428671 | 428830 | YBR092C     | PHO3   |
| 20 | 428883 | 428984 | YBR092C     | PHO3   |
| 20 | 429576 | 429959 | YBR093C     | PHO5   |
| 20 | 430186 | 430249 | YBR093C     | PHO5   |
| 20 | 430335 | 430426 | YBR093C     | PHO5   |
| 20 | 430521 | 430680 | YBR093C     | PHO5   |
| 20 | 430698 | 430834 | YBR093C     | PHO5   |
| 20 | 430881 | 430936 | YBR093C     | PHO5   |
| 21 | 463997 | 464290 | YBR112C     | CYC8   |
| 22 | 477659 | 479049 | YBR118W     | TEF2   |
| 23 | 541431 | 541526 | YBR150C     | TBS1   |
| 23 | 541577 | 541639 | YBR150C     | TBS1   |
| 24 | 591706 | 592422 | YBR181C     | RPS6B  |
| 25 | 604937 | 605061 | YBR189W     | RPS9B  |
| 25 | 605069 | 605152 | YBR189W     | RPS9B  |
| 25 | 605195 | 605451 | YBR189W     | RPS9B  |
| 25 | 606653 | 606731 | YBR191W     | RPL21A |
| 25 | 606734 | 606918 | YBR191W     | RPL21A |
| 25 | 606920 | 607131 | YBR191W     | RPL21A |
| 25 | 627307 | 627364 | YBR202W     | MCM7   |
| 26 | 642988 | 643084 | tC(GCA)B    |        |
| 26 | 643470 | 643865 | YBRctau2    |        |
| 26 |        |        | YBRWdelta18 |        |
| 26 | 645147 | 645250 | tE(UUC)B    |        |
| 26 | 646075 | 646133 | /           |        |

|    |        |        |           |              |
|----|--------|--------|-----------|--------------|
| 27 | 659261 | 659328 | YBR218C   | <i>PYC2</i>  |
| 27 | 659576 | 659630 | YBR218C   | <i>PYC2</i>  |
| 27 | 659645 | 659730 | YBR218C   | <i>PYC2</i>  |
| 27 | 659774 | 659853 | YBR218C   | <i>PYC2</i>  |
| 27 | 660212 | 660594 | YBR218C   | <i>PYC2</i>  |
| 27 | 660610 | 660759 | YBR218C   | <i>PYC2</i>  |
| 27 | 660791 | 660948 | YBR218C   | <i>PYC2</i>  |
| 27 | 661274 | 661362 | YBR218C   | <i>PYC2</i>  |
| 27 | 661406 | 661455 | YBR218C   | <i>PYC2</i>  |
| 27 | 661460 | 661757 | YBR218C   | <i>PYC2</i>  |
| 27 | 661835 | 661965 | YBR218C   | <i>PYC2</i>  |
| 27 | 701990 | 702056 | /         |              |
| 27 | 780350 | 780468 | YBR289W   | <i>SNF5</i>  |
| 28 | 801690 | 801919 | YBR297W   | <i>MAL33</i> |
| 29 | 804863 | 808394 | YBR298C-A |              |
| 29 |        |        | YBR299W   | <i>MAL32</i> |
| 29 | 808396 | 813178 | YBR300C   |              |
| 29 |        |        | YBR301W   | <i>PAU24</i> |
| 29 |        |        | YBR302C   | <i>COS2</i>  |

---
