# Supplementary material for: Sequence Profiling of the Saccharomyces cerevisiae Genome Permits Deconvolution of Unique and Multialigned Reads for Variant Detection
Source: PubMed Central journal article supplement (PMC4059241; doi:10.1534/g3.113.009464), 2014-02-20
Supplement: supp_g3.113.009464_TableS2.pdf [file supp_g3.113.009464_TableS2.pdf]

**Table S2 Constitutive SNPs found in the U regions in the wild-type mutation accumulation lines**

| Line       | Chrom.  | Position | ORF        | Gene        | Ref. | Variant | Aa change  | Sequence Ontology term |
|------------|---------|----------|------------|-------------|------|---------|------------|------------------------|
| wt_ABCE100 | chrII   | 15 101   | YBL105C    | <i>PKC1</i> | T    | G       | I866L      | missense_variant       |
| wt_ABCE100 | chrIII  | 143 131  | Intergenic | -           | T    | C       | -          | intergenic_variant     |
| wt_ABCE100 | chrIII  | 162 361  | Intergenic | -           | T    | C       | -          | intergenic_variant     |
| wt_ABCE100 | chrIII  | 162 640  | YCR024C-B  | YCR024C-B   | T    | G       | S76R       | missense_variant       |
| wt_ABCE100 | chrIII  | 162 694  | YCR024C-B  | YCR024C-B   | G    | A       | synonymous | synonymous_variant     |
| wt_ABCE100 | chrIII  | 163 059  | YCR024C-A  | <i>PMP1</i> | T    | C       | synonymous | synonymous_variant     |
| wt_ABCE100 | chrV    | 48 384   | Intergenic | -           | T    | C       | -          | intergenic_variant     |
| wt_ABCE100 | chrV    | 154 531  | YER001W    | <i>MNN1</i> | T    | A       | S338T      | missense_variant       |
| wt_ABCE100 | chrV    | 352 394  | YER096W    | <i>SHC1</i> | A    | G       | K233E      | missense_variant       |
| wt_ABCE100 | chrV    | 517 529  | Intergenic | -           | T    | C       | -          | intergenic_variant     |
| wt_ABCE100 | chrXIII | 448 333  | Intergenic | -           | G    | A       | -          | intergenic_variant     |
| wt_ABCE100 | chrXIII | 680 936  | YMR207C    | <i>HFA1</i> | T    | C       | K877E      | missense_variant       |
| wt_ABCE100 | chrXIII | 680 940  | YMR207C    | <i>HFA1</i> | C    | T       | synonymous | synonymous_variant     |
