# Supplementary material for: Sequence Profiling of the Saccharomyces cerevisiae Genome Permits Deconvolution of Unique and Multialigned Reads for Variant Detection
Source: PubMed Central journal article supplement (PMC4059241; doi:10.1534/g3.113.009464), 2014-02-20
Supplement: supp_g3.113.009464_TableS3.pdf [file supp_g3.113.009464_TableS3.pdf]

**Table S3 Acquired SNPs found in the U regions in the wild-type mutation accumulation lines**

| Line    | Chrom.  | Position  | ORF        | Gene           | Ref. | Variant | Aa change  | Sequence Ontology term |
|---------|---------|-----------|------------|----------------|------|---------|------------|------------------------|
| wt_A100 | chrII   | 468 275   | YBR114W    | <i>RAD16</i>   | C    | T       | T343M      | missense_variant       |
| wt_B100 | chrIII  | 1 989     | YCL076W    | <i>YCL076W</i> | G    | A       | G200S      | missense_variant       |
| wt_B100 | chrIV   | 191 155   | YDL147W    | <i>RPN5</i>    | C    | A       | Q78K       | missense_variant       |
| wt_A100 | chrIV   | 573 098   | YDR060W    | <i>MAK21</i>   | A    | T       | D817V      | missense_variant       |
| wt_B100 | chrIV   | 738 528   | YDR141C    | <i>DOP1</i>    | A    | C       | I490M      | missense_variant       |
| wt_A100 | chrIV   | 866 198   | YDR207C    | <i>UME6</i>    | C    | T       | R442Q      | missense_variant       |
| wt_E100 | chrIV   | 1 171 524 | YDR348C    | <i>PAL1</i>    | G    | A       | P101L      | missense_variant       |
| wt_E100 | chrIV   | 1 452 784 | YDR501W    | <i>PLM2</i>    | G    | T       | E478STOP   | stop_gained            |
| wt_B100 | chrIV   | 1 486 605 | YDR523C    | <i>SPS1</i>    | G    | T       | A145D      | missense_variant       |
| wt_C100 | chrV    | 234 495   | YER041W    | <i>YEN1</i>    | T    | C       | S679P      | missense_variant       |
| wt_C100 | chrV    | 312 202   | Intergenic | -              | A    | G       | -          | intergenic_variant     |
| wt_E100 | chrV    | 404 934   | YER123W    | <i>YCK3</i>    | A    | G       | Q41R       | missense_variant       |
| wt_C100 | chrVII  | 313 763   | YGL100W    | <i>SEH1</i>    | G    | T       | R177I      | missense_variant       |
| wt_E100 | chrVII  | 376 132   | YGL067W    | <i>NPY1</i>    | A    | T       | H11L       | missense_variant       |
| wt_C100 | chrVII  | 1 041 377 | YGR274C    | <i>TAF1</i>    | G    | T       | synonymous | synonymous_variant     |
| wt_B100 | chrVIII | 137 015   | YHR016C    | <i>YSC84</i>   | G    | A       | P425S      | missense_variant       |
| wt_A100 | chrVIII | 275 555   | YHR084W    | <i>STE12</i>   | A    | G       | Y461C      | missense_variant       |
| wt_A100 | chrVIII | 368 794   | YHR132C    | <i>ECM14</i>   | A    | G       | L334S      | missense_variant       |
| wt_A100 | chrVIII | 390 799   | YHR146W    | <i>CRP1</i>    | C    | T       | T167I      | missense_variant       |
| wt_A100 | chrX    | 618 251   | YJR101W    | <i>RSM26</i>   | G    | A       | synonymous | synonymous_variant     |
| wt_A100 | chrXI   | 8 145     | Intergenic | -              | G    | C       | -          | intergenic_variant     |
| wt_A100 | chrXI   | 291 061   | Intergenic | -              | C    | T       | -          | intergenic_variant     |
| wt_B100 | chrXI   | 480 315   | YKR021W    | <i>ALY1</i>    | A    | C       | E361A      | missense_variant       |
| wt_E100 | chrXII  | 197 723   | YLR027C    | <i>AAT2</i>    | T    | A       | K121N      | missense_variant       |
| wt_B100 | chrXII  | 318 957   | YLR089C    | <i>ALT1</i>    | C    | A       | Q353H      | missense_variant       |
| wt_C100 | chrXII  | 357 349   | YLR106C    | <i>MDN1</i>    | G    | A       | synonymous | synonymous_variant     |
| wt_E100 | chrXII  | 360 374   | YLR106C    | <i>MDN1</i>    | T    | G       | Y1122S     | missense_variant       |
| wt_B100 | chrXII  | 837 516   | Intergenic | -              | C    | T       | -          | intergenic_variant     |
| wt_E100 | chrXII  | 935 171   | YLR409C    | <i>UTP21</i>   | G    | C       | S688W      | missense_variant       |
| wt_E100 | chrXII  | 1 034 119 | YLR450W    | <i>HMG2</i>    | T    | G       | F498C      | missense_variant       |
| wt_B100 | chrXIII | 470 741   | YMR102C    | <i>YMR102C</i> | T    | A       | S538C      | missense_variant       |
| wt_A100 | chrXIII | 912 702   | Intergenic | -              | G    | T       | -          | intergenic_variant     |
| wt_B100 | chrXIV  | 275 036   | YNL193W    | <i>YNL193W</i> | G    | A       | synonymous | synonymous_variant     |
| wt_C100 | chrXIV  | 752 345   | YNR065C    | <i>YNR065C</i> | G    | C       | S452R      | missense_variant       |
| wt_A100 | chrXV   | 406 610   | Intergenic | -              | T    | C       | -          | intergenic_variant     |
| wt_C100 | chrXV   | 594 444   | Intergenic | -              | A    | T       | -          | intergenic_variant     |
| wt_C100 | chrXVI  | 120 124   | Intergenic | -              | A    | T       | -          | intergenic_variant     |
| wt_A100 | chrXVI  | 307 821   | YPL128C    | <i>TBF1</i>    | G    | A       | T134I      | missense_variant       |
| wt_A100 | chrXVI  | 510 123   | Intergenic | -              | G    | T       | -          | intergenic_variant     |
